1 **Coordinated postnatal maturation of striatal cholinergic interneurons and dopamine**  
2 **release dynamics in mice.**

3 **Abbreviated Title:** Maturation of the striatal cholinergic interneuron

4 **Author Names:**

5 1a) Avery McGuirt<sup>1,2</sup> afm2150@cumc.columbia.edu

6 1b) Ori Lieberman<sup>1,2</sup> ojl2106@cumc.columbia.edu

7 2) Michael Post<sup>1</sup> mrp2201@cumc.columbia.edu

8 3) Irena Pigulevskiy<sup>1</sup> ip2382@cumc.columbia.edu

9 4) David Sulzer<sup>1</sup> ds43@cumc.columbia.edu

10  
11 <sup>1</sup>Departments of Psychiatry and Neurology, New York State Psychiatric Institute, Columbia  
12 University College of Physicians and Surgeons, New York, NY, 10032, United States

13 <sup>2</sup> These authors contributed equally to this work.

14  
15 Correspondence should be addressed to OL [ojl2106@columbia.edu](mailto:ojl2106@columbia.edu) or DS [ds43@columbia.edu](mailto:ds43@columbia.edu)

16  
17 **Conflict of Interest:** The authors declare no competing financial interests.

18  
19 **Acknowledgments:** A.F.M. was supported by NIMH (3T32NS064928-09); O.J.L. was  
20 supported by NIMH (5F30MH114390-02); MRP was supported by NIMH (5T32MH020004). This  
21 work was supported from grants by the National Institutes of Health (NIDA R01DA007418); the  
22 Simons Foundation (SFARI 514813); and the JPB Foundation. We thank Sejoon Choi for  
23 technical guidance and generous training on electrophysiology technique. We also thank  
24 Eugene Mosharov, who developed our cyclic voltammetry acquisition and analysis software and  
25 provided further technical support.

26  
27 **Pages:** 25

28 **Figures:** 6

29 **Word Counts:** [abstract: 240] [introduction: 600] [discussion: 1368]

## 30 **Abstract**

31           Dynamic changes in motor abilities and motivated behaviors occur during the juvenile  
32 and adolescent periods. The striatum is a subcortical nucleus critical for action selection, motor  
33 learning and reward processing. Its tonically active cholinergic interneuron (ChI) is an integral  
34 regulator of the synaptic activity of other striatal neurons, as well as afferent axonal projections  
35 of midbrain dopamine neurons. Thalamic and dopaminergic inputs initiate pauses in ChI firing  
36 following salient sensory cues that are extended for several hundred milliseconds by intrinsic  
37 regenerative currents. Here, we characterize the electrophysiological and morphological  
38 features of ChIs during mouse postnatal development. We demonstrate that ChI spontaneous  
39 activity increases with age while the duration of the pause in firing induced by depolarizing  
40 inputs decreases during postnatal development. Maturation of ChI activity is driven by two  
41 distinct physiological changes: decreased amplitude of the afterhyperpolarization between P14 and  
42 P18 and increased  $I_h$  conductance between the late postnatal period and adulthood. Finally,  
43 we uncover postnatal changes in dopamine release properties that are mediated by cholinergic  
44 signalling. At P10, striatal dopamine release is diminished compared to the adult, but our data  
45 show efficient summation of dopamine release evoked by multiple grouped stimuli that subsides  
46 by P28. Blockade of nicotinic acetylcholine receptors enhances release summation in mice  
47 older than P28 but has little effect at P10. These data demonstrate a physiological maturation of  
48 ChI activity and indicate a reciprocal interaction between the postnatal maturation of striatal ChI  
49 and dopamine neurotransmission.

50

## 51 **Significance Statement**

52 Motor skills and motivated behavior regimes develop rapidly during the postnatal period. The  
53 functional development of the striatal cholinergic interneuron (ChI), which contributes to these  
54 behaviors in adulthood, remains unexplored. In this study, we tracked the ontogeny of  
55 spontaneous ChI activity and cellular morphology, as well as the developmental trajectory of ion

56 conductances characteristic to this population. We further report a developmental link between  
57 ChI activity and dopamine release, revealing a change in the frequency-dependence of  
58 dopamine release during the early postnatal period that is mediated by cholinergic signaling.  
59 This study provides evidence that striatal microcircuits are dynamic during the postnatal period  
60 and that they undergo coordinated maturation.

61

## 62 **Introduction**

63 The early postnatal period is a time of increasing sensory perception and the  
64 development of complex motor behaviors (Altman and Sudarshan, 1975; Shaywitz et al., 1979;  
65 Westerga and Gramsbergen, 1990). In rodents, locomotor activity increases dramatically during  
66 the second postnatal week (Altman and Sudarshan, 1975; Shaywitz et al., 1979; Westerga and  
67 Gramsbergen, 1990), together with increased exploration and the acquisition of motivated  
68 behaviors that integrate internal and external states (Hall et al., 1977).

69 The striatum is the main input nucleus of the basal ganglia and contributes to action  
70 selection, motor learning and motivated behaviors in the adult (Gerfen and Surmeier, 2011).  
71 The cholinergic interneuron (ChI) comprises only about 1-5% of striatal neurons (Kemp and  
72 Powell, 1971a, 1971b), but due to its widespread axonal arborization and synaptic connections  
73 with other striatal neurons, acts as a critical node in striatal synaptic computation (DiFiglia et al.,  
74 1976; DiFiglia, 1987; Kawaguchi, 1993; Goldberg and Reynolds, 2011; Goldberg et al., 2012).  
75 ChIs form axo-axonic synapses with dopaminergic axons and regulate dopamine (DA) release  
76 during motivated behaviors (Le Novère et al., 1996; Azam et al., 2002; Zoli et al., 2002; Exley  
77 and Cragg, 2008; Sulzer et al., 2016; Mohebi et al., 2019). ChIs are tonically pace-making  
78 neurons with spontaneous firing frequencies between 2-10 Hz (Wilson et al., 1990; Bennett and  
79 Wilson, 1999). *In vivo*, ChIs respond to rewarding or aversive salient stimuli with pauses in firing  
80 that can last for several hundred milliseconds (Aosaki et al., 1994b). It is unknown if ChI tonic  
81 activity or the mechanisms that drive pauses in activity mature postnatally.

82           In the adult, spontaneous ChI activity is driven by intrinsic ion conductances that occur in  
83 the absence of synaptic activity (Bennett et al., 2000).  $I_h$ , the current mediated by  
84 hyperpolarization-activated cyclic nucleotide-gated (HCN) channels, depolarizes ChIs to -60 mV,  
85 where HCN channels inactivate. A persistent sodium current then drives the cell to its action  
86 potential threshold where  $Ca_v2$  calcium channels open (Bennett et al., 2000). After the cell fires,  
87 calcium-activated potassium channels,  $S_K$  and  $B_K$  repolarize the cell and control the magnitude  
88 of a change in voltage known as the “medium afterhyperpolarization” (mAHP) (Goldberg and  
89 Wilson, 2005).

90           In the adult, a pause in ChI activity following salient cues is initiated by excitatory  
91 thalamic inputs (Matsumoto et al., 2001) and is dependent on DA signaling (Aosaki et al.,  
92 1994a; Reynolds et al., 2004; Zhang et al., 2018). The decrease in firing rate persists beyond  
93 the initial excitatory input and is driven by a combination of  $I_h$  and a barium-sensitive potassium  
94 current that may be mediated by delayed-rectifier  $K_v7$  potassium channels (Wilson, 2005;  
95 Zhang et al., 2018). The intrinsic component of this pause is known as the “slow  
96 afterhyperpolarization” (sAHP) and can be experimentally evoked by injecting depolarizing  
97 current.

98           To address the postnatal maturation of ChI activity, we performed cell-attached and  
99 whole-cell recordings of ChIs in the dorsal striatum in acute brain slices from mice over a range  
100 of ages. We found that the spontaneous activity of ChIs increases linearly from postnatal day 10  
101 (P10) into adulthood. Two distinct transitions in ChI physiology drive the changes in firing rate:  
102 the mAHP decreases dramatically between P14 and P18, followed by an increase in the  
103 putative HCN current between P28 and adulthood. In addition to the maturation of spontaneous  
104 activity, the sAHP decreases in length from P10 to adulthood. Finally, using fast-scan cyclic  
105 voltammetry (FSCV), we show that immature DA release properties at P10 arise from the  
106 absence of striatal cholinergic tone. These data provide a foundation for further studies of the  
107 role of ChIs in the postnatal acquisition of complex motor tasks and motivated behaviors.

108

## 109 **Materials and Methods**

### 110 *Animals*

111 C57Bl6J breeder pairs were obtained from Jackson Laboratories (Bar Harbor, ME). Transgenic  
112 Dat-Ires-Cre Ai38 mice were generated as described (Lieberman et al., 2017). Mice were  
113 housed in same-sex groups of 2-4 on a 12-hour light/dark cycle with water and food available ad  
114 libitum. Breeding pairs were checked daily for pregnancy and new litters. Mice were used for  
115 experiments on the specified postnatal day ( $\pm 1$ ) in all experiments. All experimental procedures  
116 were approved by the Columbia University Institutional Animal Care and Use Committee and  
117 followed NIH guidelines. Data combine male and female mice, and no differences were  
118 observed between sexes.

### 119 *Electrophysiology*

120 Acute brain slices were generated as described previously (Lieberman et al., 2018; Lieberman  
121 et al., 2020). Mice underwent rapid cervical dislocation. The brain was placed in ice-cold cutting  
122 buffer (in mM): 10 NaCl, 2.5 KCl, 25 NaHCO<sub>3</sub>, 0.5 CaCl<sub>2</sub>, 7 MgCl<sub>2</sub>, 1.25 NaH<sub>2</sub>PO<sub>4</sub>, 180 sucrose,  
123 10 glucose bubbled with 95% O<sub>2</sub>/5% CO<sub>2</sub> to pH 7.4. Coronal slices (250  $\mu$ m) were generated  
124 using a Leica vibratome and placed in artificial cerebrospinal fluid (ACSF) and allowed to rest at  
125 34°C for 30 minutes. The recipe for ACSF was (in mM): 125 NaCl, 2.5 KCl, 25 NaHCO<sub>3</sub>, 2  
126 CaCl<sub>2</sub>, 1 MgCl<sub>2</sub>, 1.25 NaH<sub>2</sub>PO<sub>4</sub> and 10 glucose bubbled with 95% O<sub>2</sub>/5% CO<sub>2</sub> to pH 7.4. Slices  
127 were then maintained at room temperature for a maximum of 5 hours for recordings.  
128 At the time of recording, slices were transferred to the recording chamber and superfused with  
129 ACSF maintained at 34°C. ChIs were identified based on the large soma size under IR/DIC  
130 optics using a 40X water immersion objective. Liquid junction potential was not corrected. Data  
131 were acquired using an Axon Instruments Axopatch 200, digitized using a Digidata 1440A at 10  
132 kHz, and filtered at 5 kHz.

133 Cell-attached and whole cell recordings were accomplished using glass pipettes (2-6 M $\Omega$ ) filled  
134 with internal solution (in mM): 115 potassium gluconate, 20 KCl, 20 HEPES, 1 MgCl<sub>2</sub>, 2 MgATP,  
135 0.2 NaGTP adjusted to pH 7.25 with KOH, osmolarity 285 mOsm. Spontaneous firing frequency  
136 in cell-attached mode was recorded for 3 minutes. Subsequently, a giga-ohm seal was achieved  
137 and the cell membrane was ruptured. Spontaneous action potential firing was recorded in  
138 current clamp, followed by measurement of the IV curve. Finally, inward currents were recorded  
139 in voltage clamp mode.

#### 140 *Dendritic reconstructions*

141 Dendritic reconstructions were obtained and analyzed essentially as described (Lieberman et  
142 al., 2018). Briefly, neurobiotin (1mg/mL, Vector Laboratories) was added to the internal solution  
143 and allowed to diffuse into the cell for 15 minutes after the whole cell configuration was  
144 established. The slice was then fixed in 4% PFA in 0.1M phosphate buffer (PB), pH 7.4  
145 overnight. Slices were stained with Alexafluor488-conjugated streptavidin (1:200, ThermoFisher)  
146 in 0.6% TritonX-100 in TBS. Finally, slices were mounted and cover slipped. Slides were  
147 imaged on a Leica SP5 confocal microscope in system optimized Z-stacks using a 20X  
148 objective. Dendritic trees were traced using the simple neurite tracer plugin in ImageJ. Traced  
149 neurites were collapsed into a max projection and analyzed using the Sholl Analysis plugin.

#### 150 *Cyclic voltammetry*

151 Electrochemical recordings of evoked DA release by fast-scan cyclic voltammetry (FSCV) were  
152 collected as detailed previously (Lieberman et al., 2018). Carbon fiber working electrodes were  
153 made by aspirating a single carbon fiber (5  $\mu$ m diameter) into a glass capillary (1.2mm  
154 borosilicate, A-M Systems), and pulling to a long taper with a micropipette puller (Sutter; P-97).  
155 Fibers were cut to an exposed length of ~100  $\mu$ m, and silver leads (0.015"; A-M Systems) were  
156 permanently affixed inside the pipette by coating with colloidal silver paint before insertion.  
157 Striatal slices were prepared as for electrophysiology experiments (see above). During  
158 recordings, slices were kept under constant superfusion of oxygenated ACSF (2 mL/min, 34°C).

159 A carbon fiber working electrode was placed in the dorsolateral striatum approximately 50  $\mu\text{m}$   
160 into the slice. A triangular voltage wave ( $-450$  to  $+800$  mV at  $294$  mV/ms versus Ag/AgCl) was  
161 applied across the working electrode every 100 ms and current was monitored with an Axopatch  
162 200B amplifier (Axon Instruments) using a 5 kHz low-pass Bessel Filter setting and 25 kHz  
163 sampling rate. Signals were digitized using an ITC-18 board (Instrutech) and recorded with  
164 IGOR Pro 6.37 software (WaveMetrics), using in-house acquisition procedures. Slices were  
165 stimulated with a sharpened bipolar concentric electrode ( $400\mu\text{m}$  max outer diameter; Pt/Ir;  
166 WPI), placed  $\sim 150$   $\mu\text{m}$  from the recording electrode, using an Iso-Flex stimulus isolator (AMPI)  
167 triggered by a Master-9 pulse generator (AMPI). A single stimulus pulse ( $100$   $\mu\text{s}$   $\times$   $200$   $\mu\text{A}$ ) was  
168 applied every 2 min until stable release was achieved, after which three consecutive peaks were  
169 averaged to define single pulse release magnitude. A train stimulus was then applied ( $100$  Hz  $\times$   
170 5 pulses). For nAChR antagonism, slices were then superfused with ACSF containing DH $\beta$ E ( $1$   
171  $\mu\text{M}$ ). Slices were again stimulated with single pulses every two minutes until stable release  
172 (generally 10-15 minutes) was achieved. Finally, slices were again stimulated with the 100 Hz  
173 train. For p10 slices that showed no obvious DH $\beta$ E-evoked change in release, 100 Hz stimuli  
174 were applied at least 15 minutes after the start of DH $\beta$ E perfusion. In a given recording  
175 condition, train stimulation evoked no subsequent changes in single pulse DA release (data not  
176 shown). Data were processed and peaks quantified using an in-house procedure in IGOR Pro,  
177 and summary data was analyzed using Prism 7 (GraphPad). Electrodes were calibrated by  
178 quantifying background-subtracted voltammograms in standard solutions of DA in ACSF, made  
179 fresh each recording day.

#### 180 *Two-photon imaging*

181 Two-photon images were acquired on a Prairie (Middleton, WI) Ultima microscope system using  
182 PrairieView 4.3 software. Acute brain slices from DAT-ires-Cre  $\times$  GCAMP3 mice were collected  
183 as described above, transferred into a chamber, and perfused with ACSF at room temperature.

184 Samples were excited with a Coherent (Santa Clara, CA) Chameleon Ultra two-photon laser  
185 tuned to 920 nm, and images were collected through a photomultiplier tube channel with a 490-  
186 560 nm emission filter. The objective used was a 60X, 0.9 NA water immersion lens (Olympus).  
187 Time series were acquired from a 100 x 100 pixel ROI located within in the same field of view  
188 (1024 x 1024 pixels) as the electrode, at max speed (~ 0.15 sec / frame) for 480 frames, in  
189 Galvo mode with a dwell time 8  $\mu$ s. Pulses (200  $\mu$ A x 100  $\mu$ S) were delivered to the slice and  
190 triggered by a Master 8 pulse generator (AMPI) via a concentric bipolar electrode (WPI, see  
191 above). The slice received a single pulse or 10 pulses at 100 Hz. This was repeated ~8-12  
192 times per slice. Each ROI was quantified for mean pixel intensity in Image J (NIH) and the first  
193 and final 5 seconds were used to fit an exponential decay to each trace. The mean intensities  
194 were then normalized to the fit to derive a baseline corrected trace to correct for photobleaching,  
195 and an average of traces was calculated for each slice, serving as each N.

#### 196 *Experimental Design and Statistical Analysis*

197 Electrophysiology data were analyzed offline using Clampfit software (Molecular Devices,  
198 Sunnyvale, California). Statistical analysis was conducted in GraphPad Prism 7 (La Jolla, CA).  
199 All bar graphs show the mean $\pm$  standard error of the mean. Data comparing two variables was  
200 analyzed with a two-way ANOVA. Post-hoc Bonferroni tests were conducted when significant  
201 differences were found with the two-Way ANOVA. Data comparing one variable among >2  
202 groups was analyzed with one-Way ANOVA and Bonferroni post-tests and among 2 groups a  
203 two-tailed t test. Data were not formally tested for parametric distribution. Group sizes were  
204 preliminarily determined based on past work (Lieberman et al., 2018).

#### 205 **Results**

##### 206 *The firing patterns and frequency of ChIs mature postnatally.*

207 To address how the activity of ChIs matures postnatally, we performed cell attached  
208 recordings of visually identified ChIs at a range of ages across postnatal development. Cell-  
209 attached recordings were utilized to assess spontaneous activity in order to minimally disturb



210 the intracellular milieu and preserve spontaneous activity. ChIs were visually identified by their  
211 large cell bodies under DIC optics and cellular identity was further confirmed following  
212 conversion to the whole cell configuration (see below). We recorded from a total of 100 ChIs at  
213 P10, P14, P18, P28 and adults (P110-P120). Two cells recorded from a mouse at P10 were not  
214 spontaneously active in the cell-attached configuration but showed classic ChI characteristics in  
215 the whole-cell configuration (discussed below) and were included in subsequent analyses. All  
216 spontaneously active cells were considered to fire with tonic or rhythmic firing patterns except  
217 for two cells (one recorded at P14 and one at P18) which were considered to be “bursty”  
218 (Bennett and Wilson, 1999).

219 Spontaneous firing frequencies significantly increased across postnatal development  
220 (Figure 1A,B). ChIs exhibit variation in the regularity of their firing and ChIs classically exhibit an  
221 inverse correlation between spontaneous firing frequency and the coefficient of variation of their  
222 firing in the acute brain slice (Bennett and Wilson, 1999). Consistently, the coefficient of  
223 variation of ChIs decreased during postnatal development (Figure 1C). When the firing  
224 frequency and coefficient of variation is plotted for each individual recorded cell, a clear inverse  
225 correlation is observed between these parameters (Figure 1D). We thus conclude that the  
226 spontaneous activity of ChIs matures postnatally.

227 *ChI dendritic arborization is mature by P10.*

228 Neuronal firing patterns can be influenced by the complexity of their dendritic arbor  
229 (Mainen and Sejnowski, 1996). Following cell-attached recordings, a whole-cell configuration  
230 was established and internal solution containing neurobiotin (1 mg/mL) was allowed to diffuse  
231 into the cell. Sections were post-fixed, stained with fluorescently-labelled streptavidin and the  
232 filled cells were reconstructed using confocal microscopy. A subset of 61 cells from the 100  
233 recorded as described above were successfully reconstructed. Cumulative dendritic length was  
234 not significantly different between the ages examined (Figure 2A). Interestingly, Sholl analysis  
235 revealed a transient significant increase in dendritic complexity in ChIs at P14 compared to P10,

236 returning by P18 (Figure 2B,C). These data suggest that the dendritic arborization of ChIs is  
237 largely mature by P10 and reveal a previously unreported stage of dendritic overgrowth and  
238 regression at P14.

239 *Maturation of the mAHP, but not resting potential or action potential threshold, occurs during the*  
240 *juvenile period.*

241 As the dendritic arborization of ChIs does not mature in parallel with spontaneous firing  
242 frequency, we examined additional properties of ChI physiology that could contribute to the  
243 increasing firing frequency observed during postnatal development.

244 First, we confirmed that the age-dependent increase in ChI spontaneous firing frequency  
245 also occurred in the whole-cell configuration (data not shown). The recorded cells were  
246 observed to exhibit classic features of ChIs including a sag in response to hyperpolarizing  
247 current injection and a pause in firing following depolarizing current injection (Figure 3A)  
248 (Kawaguchi, 1993; Bennett and Wilson, 1999). Cells without a sag or pause were excluded from  
249 the dataset.

250 We analyzed properties of ChI action potentials that could underlie changes in firing  
251 frequency. Sample pairs of action potentials are shown in Figure 3B. In these examples, the  
252 action potential threshold did not significantly differ with age (Figure 3C). To emphasize the  
253 salient features of these traces, the action potential amplitude is truncated. Neither action  
254 potential width nor amplitude was significantly affected by age (data not shown).

255 One possible explanation for an increased spontaneous firing frequency of ChIs during  
256 postnatal development is that the action potential threshold becomes more hyperpolarized,  
257 allowing the threshold to be reached more readily. Alternatively, the resting membrane potential  
258 (reported as the midpoint between two action potentials) could become more depolarized. We  
259 found, however, that age did not significantly affect either parameter (Figure 3A,B).

260 In contrast, the magnitude of the mAHP significantly decreased between P10 and  
261 adulthood (Figure 3C). Further, a robust negative correlation is observed between mAHP and

262 firing rate in ChIs (Figure 3D), suggesting that decreasing mAHP may contribute to the  
263 developmental increase in spontaneous firing frequency. The mAHP reached the adult level by  
264 P18, however, indicating that additional changes in ChI physiology drive increases in firing  
265 frequency that occur beyond this age.

266 *Maturation of inward currents.*

267 Depolarization of ChIs from the hyperpolarized potential of the mAHP is driven by  $I_h$   
268 (Bennett et al., 2000; Robinson and Siegelbaum, 2003). The magnitude of  $I_h$  can be measured  
269 in voltage clamp experiments by holding the cell at -60 mV, where HCN channels are closed,  
270 and stepping the cell to hyperpolarized potentials (Bennett et al., 2000).  $I_h$  inactivates following a  
271 hyperpolarizing voltage step and the current remaining at steady-state is mediated by leak  
272 channels (Figure 4A). Thus the magnitude of the inactivated current, or difference between  
273 maximal and steady-state inward current following hyperpolarizing voltage step, is a proxy for  $I_h$   
274 (Robinson and Siegelbaum, 2003). This inactivated inward current was stable between P10 and  
275 P28 but was significantly increased in adulthood (Figure 4B). These data suggest that increased  
276  $I_h$  may contribute to elevated spontaneous firing frequencies in adulthood.

277 *The sAHP is extended during the early juvenile period.*

278 A unique feature of ChI physiology is a pause in firing in response to salient sensory  
279 stimuli (Aosaki et al., 1994b). Although the pause can be initiated by excitatory thalamic inputs  
280 (Matsumoto et al., 2001) or D2 receptor activation (Aosaki et al., 1994a; Reynolds et al., 2004;  
281 Ding et al., 2010; Straub et al., 2014), intrinsic potassium and non-specific cation ( $I_h$ )  
282 conductances define its duration (Wilson, 2005; Wilson and Goldberg, 2006; Zhang et al.,  
283 2018). These conductances can also be triggered by injecting depolarizing currents, which  
284 mimic innervation by synaptic inputs or DA (Wilson, 2005; Wilson and Goldberg, 2006; Zhang et  
285 al., 2018) and drive a pause in firing, or sAHP. A depolarizing current step was delivered to ChIs  
286 at different ages and the duration of the pause in firing after the end of the current injection was  
287 measured (Figure 5A). The duration of the sAHP was longer at P10 and P14 than in adulthood

288 (Figure 5A,B). We conclude that the conductances that drive the sAHP are exaggerated during  
289 the early juvenile period.

290 *Summation of DA release in response to multiple grouped stimuli.*

291 The pause in ChI firing following salient sensory cues is widely considered to affect local  
292 DA release in the striatum. Acetylcholine released from striatal ChIs promotes local DA release  
293 via activation of nicotinic acetylcholine receptors (nAChR) on DA axon terminals. The interaction  
294 between DA and ACh can be probed in the acute brain slice, where it has been shown that  
295 nAChR activation on DA axons acts as a frequency-dependent filter on DA release (Zhou et al.,  
296 2001; Rice and Cragg, 2004; Zhang and Sulzer, 2004). ACh amplifies DA release in response  
297 to low-frequency stimuli, whereas prolonged stimulation or robust exogenous nAChR activation  
298 (for example, by nicotine) causes nAChR desensitization and thus decreases evoked DA  
299 release. We recently reported that the juvenile striatum shows relatively low levels of DA release  
300 in response to single electrical pulses (Lieberman et al., 2018). The changes in ChI activity over  
301 development led us to hypothesize that the low levels of ChI activity in the juvenile striatum  
302 (~P10) may lead to differences in DA release properties.

303 To address this, DA release was measured using fast-scan cyclic voltammetry (FSCV) in  
304 acute brain slices from mice at P10, P28, and in adulthood, following intrastriatal electrical  
305 stimulation. Consistent with our recent report, DA release following a single pulse increased  
306 significantly with age (Figure 6A,B). We found, however, that a train of stimuli significantly  
307 increased evoked DA release as compared to a single stimulus at P10 but not at P28 or in  
308 adulthood (Figure 6B,C). These results are reported as the ratio of evoked DA following 100 Hz  
309 stimuli to a single pulse (100Hz/1p; Figure 6C), and the ratio is significantly lower at P28 and in  
310 adulthood compared to P10. We thus conclude that DA release properties mature between P10  
311 and P28.

312 The dynamics of neurotransmitter release are heavily dependent on calcium influx and  
313 handling. To address whether calcium entry differed in DA axons between P10 and adulthood,

314 we generated transgenic mice expressing the calcium indicator, GCaMP3, in DA axons by  
315 crossing the DAT-Ires-Cre driver line (Bäckman et al., 2006) with the Ai38 line harboring a  
316 floxed allele of GCaMP3 in the Rosa26 locus (Zariwala et al., 2012; Lieberman et al., 2017). We  
317 confirmed specific GCaMP3 expression in DA neurons and axons at P10 and in adulthood (data  
318 not shown; (Lieberman et al., 2017)). To test whether calcium dynamics were distinct at P10  
319 compared to adulthood, we generated acute brain slices and imaged GCaMP3 fluorescence  
320 using two-photon microscopy. A single electrical stimulation in the striatum yielded a smaller  
321 change in fluorescence at P10 compared to DA axons in the adult striatum (Figure 6D-E).  
322 Remarkably, stimulation with electrical pulses at 100 Hz yielded an equivalent change in  
323 fluorescence at P10 and in adults (Figure 6D-E). There was a significant interaction between  
324 age and stimulation, with DA axons at P10 having a significantly increased summation of  
325 depolarizing stimuli compared to adults (Figure 6F-G). These data suggest that the postnatal  
326 maturation of DA release dynamics may arise from changes in calcium dynamics.

327         Interestingly, the observation that similar levels of DA are evoked following 100 Hz  
328 stimulation at P10 and P28 (Figure 6B) suggests that the lower evoked DA at P10 following a  
329 single pulse may not arise from low DA stores but rather from differences in the regulation of DA  
330 release properties particular to the immature striatal microcircuit. In the adult, the relative  
331 absence of DA release summation arises from nAChR activation on DA axons (Sulzer et al.,  
332 2016). Given the apparent efficiency of DA release summation following grouped stimuli in the  
333 juvenile striatum, we hypothesized that signaling through the nAChR is diminished in the  
334 juvenile. We thus tested the effect of a nAChR antagonist, dihydro- $\beta$ -erythroidine hydrobromide  
335 (DH $\beta$ E) on single-stimulus release magnitude and release summation following grouped stimuli.  
336 Evoked DA release was first measured in response to a single pulse and a train of five pulses  
337 (100 Hz), after which DH $\beta$ E was superfused onto the slice and evoked DA was measured in  
338 response to the same stimulus paradigms. DH $\beta$ E significantly increased the 100Hz/1p ratio at

339 P28 and in the adult but had no effect at P10 (Figure 6H). These data suggest that the  
340 difference in DA release properties between P10, P28, or adults arises from increasing  
341 cholinergic activity in the striatum during early postnatal maturation.

## 342 **Discussion**

343 Here, we investigated the ontogeny of ChI firing during the postnatal development of the  
344 striatum. Using patch-clamp electrophysiology and FSCV, we have demonstrated profound  
345 changes in ChI physiology and cholinergic modulation of DA release during early postnatal  
346 development and into adulthood. Notably, significant transitions in ChI physiology occur around  
347 P14, a time when significantly more complex motor patterns are expressed (Altman and  
348 Sudarshan, 1975). The results complement previous reports showing neurochemical maturation  
349 of cholinergic signaling during this window (Coyle and Campochiaro, 1976; Coyle and  
350 Yamamura, 1976; Sawa and Stavinoha, 1987) and suggest a possible link between ChI  
351 physiology in the juvenile striatum and maturation of an animal's behavioral repertoire.

352 *The development and maturation of the striatal cholinergic system.*

353 The striatum contains the highest concentration of ACh in the brain (Fibiger, 1982). In  
354 contrast to most other brain regions, however, striatal cholinergic innervation largely arises from  
355 a population of interneurons rather than from afferent innervation, for example from the basal  
356 forebrain system (Kimura et al., 1980; Henderson, 1981).

357 ChIs are generated between E13 and E15 (Phelps et al., 1989), prior to the appearance  
358 of striatal projection neurons or non-cholinergic striatal interneurons (E15-P2) (van der Kooy  
359 and Fishell, 1987; Song and Harlan, 1994; Liao et al., 2008). Although a major biosynthetic  
360 enzyme for ACh, choline acetyltransferase (ChAT), is present in ChIs at birth, ChAT expression  
361 levels increase linearly during the first four postnatal weeks and reach adult levels around P28  
362 in both rat and mouse (Guyenet et al., 1975; Coyle and Yamamura, 1976; Phelps et al., 1989;  
363 Aznavour et al., 2003). Striatal ACh levels follow a similar developmental trajectory (Coyle and  
364 Campochiaro, 1976; Coyle and Yamamura, 1976; Phelps et al., 1989). The protracted postnatal

365 maturation of ACh neurochemistry has been suggested to underlie a delayed interaction  
366 between cholinergic and dopaminergic pharmacology in the developing rodent, which reportedly  
367 reaches functional maturity around P20 (Burt et al., 1982; Fitzgerald and Hannigan, 1989).  
368 Although striatal ChIs appear in tandem with basal forebrain cholinergic neurons, their functional  
369 development lags behind the basal forebrain system (Phelps et al., 1989), suggesting that cues  
370 specific to the striatum may contribute to ChI maturation.

371 Here, we extend the analysis of the ontogeny of the striatal cholinergic system by  
372 electrophysiological analysis of ChIs during mouse postnatal development. We find that the  
373 maturation of ChI firing frequencies mirrors the time course of tissue ACh levels and expression  
374 of ChAT, suggesting that ACh itself may provide a feedback mechanism to drive maturation of  
375 ChI physiology during postnatal development. We also find that the time course of the  
376 maturation of ChI activity is similar to that of DA release, suggesting a possible reciprocal  
377 connection between DA signaling and ChI maturation.

378

### 379 *Biophysical mechanisms of the maturation of ChI firing.*

380 The frequency of tonic ChI firing is determined by the coordinated activity of intrinsic  
381 conductances (Wilson et al., 1990; Bennett et al., 2000; Goldberg and Wilson, 2005; Goldberg  
382 and Reynolds, 2011). What drives the maturation of ChI spontaneous firing described here?

383 At P10 and P14, the amplitude of the mAHP is significantly increased relative to ages  
384 above P18 (Figure 3). In the adult, the mAHP is determined by the activity of  $S_K$  and  $B_K$   
385 channels (Goldberg and Wilson, 2005).  $S_K$  and  $B_K$  currents are mediated not only by channel  
386 levels and function, but also in response to changes in calcium entry during action potential  
387 firing that initiates  $S_K$  and  $B_K$  channel opening. Future efforts will determine how the activities of  
388 these channels are altered during postnatal maturation.

389 A second mechanism must drive further increases in spontaneous ChI firing beyond  
390 P18, when the mAHP amplitude reaches adult levels (Figures 1 and 3). We found that the



391 magnitude of  $I_h$ , which depolarizes ChIs from the mAHP toward the action potential threshold  
392 (Kawaguchi, 1993; Bennett et al., 2000), increased from P28 to adulthood (Figure 4). Thus, the  
393 maturational increase in ChI tonic firing appears to be due to the sequential decrease in mAHP  
394 followed by an increase in  $I_h$ .

395 We also report a maturational increase in the ChI pause with age. Although the ChI  
396 pause is initiated by thalamic inputs and requires DA signaling, regenerative intrinsic properties  
397 determine its duration (Aosaki et al., 1994a; Matsumoto et al., 2001; Reynolds et al., 2004;  
398 Wilson, 2005; Zhang et al., 2018). The increased pause duration over maturation is consistent  
399 with the maturation of the sAHP during postnatal development (Figure 5). We note that for the  
400 purposes of this study, we limited analysis to the intrinsic components the ChI pause. Future  
401 work will address whether thalamic and DA inputs to ChIs mature in parallel with intrinsic  
402 mechanisms.

403 As the duration of the ChI pause contributes to striatal-based learning by altering DA  
404 neurotransmission and synaptic plasticity onto SPNs (Goldberg et al., 2012), differences in ChI  
405 pause dynamics might provide a mechanism for changes in learning strategy and reward  
406 sensitivity during juvenile and adolescent periods (Sturman et al., 2010; Doremus-Fitzwater et  
407 al., 2012; Sturman and Moghaddam, 2012; Spear, 2013).

408

#### 409 *Maturation of DA release properties depends on ChIs*

410 To address the functional implications of immature ChI activity during the juvenile period,  
411 DA release properties, which are regulated by nAChR activity in adulthood (Zhou et al., 2001;  
412 Rice and Cragg, 2004; Zhang and Sulzer, 2004; Sulzer et al., 2016), were measured using  
413 FSCV. We previously reported that evoked DA release increases during postnatal development  
414 in the striatum (Lieberman et al., 2018a). In the adult striatum, electrical stimuli elicit DA release  
415 through two mechanisms: cell-autonomous depolarization of DA axons, and via activation of  
416 nAChRs on DA axons by ACh (Zhou et al., 2001; Rice and Cragg, 2004; Zhang and Sulzer,



417 2004; Sulzer et al., 2016). Notably, nAChR antagonists block the majority of evoked DA after a  
418 single electrical stimulus in the adult striatum. Reduced cholinergic tone in the striatum would,  
419 thus, contribute to decreased evoked DA following a single pulse during the early juvenile  
420 period.

421 While acute activation of the nAChR facilitates evoked release, prolonged stimulation or  
422 pharmacological intervention cause desensitization of the nAChR and a resulting reduction in  
423 DA release capacity through this mechanism. Thus, while dopamine release in the adult is  
424 largely independent of stimulation frequency or number of grouped stimuli at baseline, nAChR  
425 desensitization elicits a capacity for summation of DA release with multiple stimuli at high  
426 frequency (Zhou et al., 2001; Rice and Cragg, 2004; Zhang and Sulzer, 2004; Sulzer et al.,  
427 2016). Here, we find that in contrast to these previous reports from adult mice, DA release is  
428 efficiently summed across multiple grouped stimuli at P10 even without pharmacological  
429 intervention. We confirmed that, in addition to DA release itself, electrically-evoked increases in  
430 calcium within DA axons also underwent postnatal maturation as DA axons at P10 had  
431 significantly more summation compared to the adult. Moreover, a nAChR antagonist did not  
432 enhance the summation of DA release at P10, but did so at P28 and in adults. We conclude that  
433 altered DA release properties in the juvenile striatum, including decreased release to a single  
434 stimulus and increased summation of DA release across grouped stimuli, are mediated by  
435 deficient signaling through the nAChR that then matures over the early postnatal period.

436 A limitation of this study is that we did not correlate changes in Chl firing patterns with  
437 ACh release. It is notable that tissue ACh, choline acetyltransferase, and acetylcholinesterase  
438 (AChE) each increase during postnatal development (Guyenet et al., 1975; Butcher and Hodge,  
439 1976; Coyle and Yamamura, 1976; Murrin and Ferrer, 1984) with a time course that mirrors the  
440 maturation of spontaneous Chl firing we report. Recently developed fluorescent sensors can  
441 measure changes in extracellular ACh levels (Jing et al., 2018) and may contribute to further  
442 analysis of these relationships. We note that a non-exclusive additional mechanism related to the

443 regulation of DA release by ChI could be related to maturational changes in the expression of  
444 the amount, type, coupling or cell types expressing striatal nAChRs.

445

#### 446 *Conclusion*

447 In the adult, ChIs are widely reported to play a central role in the striatal control of action  
448 and motor learning. We report that key features of ChI electrophysiology, including spontaneous  
449 firing frequency and pauses in their activity, mature during the first four postnatal weeks, a  
450 period of acquisition of complex motor skills and enhanced sensitivity to reward. This occurs in  
451 tandem with changes in DA release properties that are mediated by cholinergic signaling,  
452 indicating that ChI and DA neurons may play reciprocal roles in the developmental regulation  
453 striatal function.

454

#### 455 **References**

456

457 Altman J, Sudarshan K (1975) Postnatal development of locomotion in the laboratory rat. *Anim*  
458 *Behav* 23:896–920.

459 Aosaki T, Graybiel AM, Kimura M (1994a) Effect of the nigrostriatal dopamine system on  
460 acquired neural responses in the striatum of behaving monkeys. *Science* 265:412–415.

461 Aosaki T, Tsubokawa H, Ishida A, Watanabe K, Graybiel AM, Kimura M (1994b) Responses of  
462 tonically active neurons in the primate's striatum undergo systematic changes during  
463 behavioral sensorimotor conditioning. *J Neurosci* 14:3969–3984.

464 Azam L, Winzer-Serhan UH, Chen Y, Leslie FM (2002) Expression of neuronal nicotinic  
465 acetylcholine receptor subunit mRNAs within midbrain dopamine neurons. *J Comp*

- 466           Neurol 444:260–274.
- 467   Aznavour N, Mechawar N, Watkins KC, Descarries L (2003) Fine structural features of the  
468           acetylcholine innervation in the developing neostriatum of rat. *J Comp Neurol* 460:280–  
469           291.
- 470   Bäckman CM, Malik N, Zhang Y, Shan L, Grinberg A, Hoffer BJ, Westphal H, Tomac AC  
471           (2006) Characterization of a mouse strain expressing Cre recombinase from the 3’  
472           untranslated region of the dopamine transporter locus. *Genesis* 44:383–390.
- 473   Bennett BD, Callaway JC, Wilson CJ (2000) Intrinsic membrane properties underlying  
474           spontaneous tonic firing in neostriatal cholinergic interneurons. *J Neurosci* 20:8493–  
475           8503.
- 476   Bennett BD, Wilson CJ (1999) Spontaneous activity of neostriatal cholinergic interneurons in  
477           vitro. *J Neurosci* 19:5586–5596.
- 478   Burt DK, Hungerford SM, Crowner ML, Baez LA (1982) Postnatal development of a cholinergic  
479           influence on neuroleptic-induced catalepsy. *Pharmacology Biochemistry and Behavior*  
480           16:533–540.
- 481   Butcher LL, Hodge GK (1976) Postnatal development of acetylcholinesterase in the caudate-  
482           putamen nucleus and substantia nigra of rats. *Brain Res* 106:223–240.
- 483   Coyle JT, Campochiaro P (1976) Ontogenesis of dopaminergic-cholinergic interactions in the rat  
484           striatum: a neurochemical study. *J Neurochem* 27:673–678.
- 485   Coyle JT, Yamamura HI (1976) Neurochemical aspects of the ontogenesis of cholinergic  
486           neurons in the rat brain. *Brain Res* 118:429–440.

- 487 DiFiglia M (1987) Synaptic organization of cholinergic neurons in the monkey neostriatum. *J*  
488 *Comp Neurol* 255:245–258.
- 489 DiFiglia M, Pasik P, Pasik T (1976) A Golgi study of neuronal types in the neostriatum of  
490 monkeys. *Brain Res* 114:245–256.
- 491 Ding JB, Guzman JN, Peterson JD, Goldberg JA, Surmeier DJ (2010) Thalamic gating of  
492 corticostriatal signaling by cholinergic interneurons. *Neuron* 67:294–307.
- 493 Doremus-Fitzwater TL, Barreto M, Spear LP (2012) Age-related differences in impulsivity  
494 among adolescent and adult Sprague-Dawley rats. *Behav Neurosci* 126:735–741.
- 495 Exley R, Cragg SJ (2008) Presynaptic nicotinic receptors: a dynamic and diverse cholinergic  
496 filter of striatal dopamine neurotransmission. *Br J Pharmacol* 153 Suppl 1:S283-97.
- 497 Fibiger HC (1982) The organization and some projections of cholinergic neurons of the  
498 mammalian forebrain. *Brain Res Rev* 4:327–388.
- 499 Fitzgerald LW, Hannigan JH (1989) Cholinergic maturation and SCH 23390-induced catalepsy  
500 in the male rat pup. *Developmental Brain Research* 47:147–150.
- 501 Gerfen CR, Surmeier DJ (2011) Modulation of striatal projection systems by dopamine. *Annu*  
502 *Rev Neurosci* 34:441–466.
- 503 Goldberg JA, Ding JB, Surmeier DJ (2012) Muscarinic modulation of striatal function and  
504 circuitry. *Handb Exp Pharmacol*:223–241.
- 505 Goldberg JA, Reynolds JNJ (2011) Spontaneous firing and evoked pauses in the tonically active  
506 cholinergic interneurons of the striatum. *Neuroscience* 198:27–43.
- 507 Goldberg JA, Wilson CJ (2005) Control of spontaneous firing patterns by the selective coupling

508 of calcium currents to calcium-activated potassium currents in striatal cholinergic  
509 interneurons. *J Neurosci* 25:10230–10238.

510 Guyenet PG, Beaujouan JC, Glowinski J (1975) Ontogenesis of neostriatal cholinergic neurones  
511 in the rat and development of their sensitivity to neuroleptic drugs. *Naunyn*  
512 *Schmiedebergs Arch Pharmacol* 288:329–334.

513 Hall WG, Cramer CP, Blass EM (1977) Ontogeny of suckling in rats: Transitions toward adult  
514 ingestion. *J Comp Physiol Psychol* 91:1141–1155.

515 Henderson Z (1981) Ultrastructure and acetylcholinesterase content of neurones forming  
516 connections between the striatum and substantia nigra of rat. *J Comp Neurol* 197:185–  
517 196.

518 Jing M et al. (2018) A genetically encoded fluorescent acetylcholine indicator for in vitro and in  
519 vivo studies. *Nat Biotechnol* 36:726–737.

520 Kawaguchi Y (1993) Physiological, morphological, and histochemical characterization of three  
521 classes of interneurons in rat neostriatum. *J Neurosci* 13:4908–4923.

522 Kemp JM, Powell TP (1971a) The structure of the caudate nucleus of the cat: light and electron  
523 microscopy. *Philos Trans R Soc Lond B, Biol Sci* 262:383–401.

524 Kemp JM, Powell TP (1971b) The synaptic organization of the caudate nucleus. *Philos Trans R*  
525 *Soc Lond B, Biol Sci* 262:403–412.

526 Kimura H, McGeer PL, Peng F, McGeer EG (1980) Choline acetyltransferase-containing  
527 neurons in rodent brain demonstrated by immunohistochemistry. *Science* 208:1057–  
528 1059.

- 529 Le Novère N, Zoli M, Changeux JP (1996) Neuronal nicotinic receptor alpha 6 subunit mRNA is  
530 selectively concentrated in catecholaminergic nuclei of the rat brain. *Eur J Neurosci*  
531 8:2428–2439.
- 532 Liao W-L, Tsai H-C, Wang H-F, Chang J, Lu K-M, Wu H-L, Lee Y-C, Tsai T-F, Takahashi H,  
533 Wagner M, Ghyselinck NB, Chambon P, Liu F-C (2008) Modular patterning of structure  
534 and function of the striatum by retinoid receptor signaling. *Proc Natl Acad Sci USA*  
535 105:6765–6770.
- 536 Lieberman OJ, Choi SJ, Kanter E, Saverchenko A, Frier MD, Fiore GM, Wu M, Kondapalli J,  
537 Zampese E, Surmeier DJ, Sulzer D, Mosharov EV (2017)  $\alpha$ -Synuclein-Dependent  
538 Calcium Entry Underlies Differential Sensitivity of Cultured SN and VTA Dopaminergic  
539 Neurons to a Parkinsonian Neurotoxin. *Eneuro* 4.
- 540 Lieberman OJ, McGuirt AF, Mosharov EV, Pigulevskiy I, Hobson BD, Choi S, Frier MD,  
541 Santini E, Borgkvist A, Sulzer D (2018) Dopamine Triggers the Maturation of Striatal  
542 Spiny Projection Neuron Excitability during a Critical Period. *Neuron* 99:540–554.e4.
- 543 Mainen ZF, Sejnowski TJ (1996) Influence of dendritic structure on firing pattern in model  
544 neocortical neurons. *Nature* 382:363–366.
- 545 Matsumoto N, Minamimoto T, Graybiel AM, Kimura M (2001) Neurons in the thalamic CM-Pf  
546 complex supply striatal neurons with information about behaviorally significant sensory  
547 events. *J Neurophysiol* 85:960–976.
- 548 Mohebi A, Pettibone JR, Hamid AA, Wong J-MT, Vinson LT, Patriarchi T, Tian L, Kennedy  
549 RT, Berke JD (2019) Dissociable dopamine dynamics for learning and motivation.  
550 *Nature* 570:65–70.

- 551 Murrin LC, Ferrer JR (1984) Ontogeny of the rat striatum: correspondence of dopamine  
552 terminals, opiate receptors and acetylcholinesterase. *Neurosci Lett* 47:155–160.
- 553 Phelps PE, Brady DR, Vaughn JE (1989) The generation and differentiation of cholinergic  
554 neurons in rat caudate—putamen. *Developmental Brain Research* 46:47–60.
- 555 Reynolds JNJ, Hyland BI, Wickens JR (2004) Modulation of an afterhyperpolarization by the  
556 substantia nigra induces pauses in the tonic firing of striatal cholinergic interneurons. *J*  
557 *Neurosci* 24:9870–9877.
- 558 Rice ME, Cragg SJ (2004) Nicotine amplifies reward-related dopamine signals in striatum. *Nat*  
559 *Neurosci* 7:583–584.
- 560 Robinson RB, Siegelbaum SA (2003) Hyperpolarization-activated cation currents: from  
561 molecules to physiological function. *Annu Rev Physiol* 65:453–480.
- 562 Sawa A, Stavinoha WB (1987) Heterogeneity of postnatal development of ACh levels in brain  
563 regions of the mouse. *Developmental Brain Research* 34:151–155.
- 564 Shaywitz BA, Gordon JW, Klopper JH, Zelterman DA, Irvine J (1979) Ontogenesis of  
565 spontaneous activity and habituation of activity in the rat pup. *Dev Psychobiol* 12:359–  
566 367.
- 567 Song DD, Harlan RE (1994) Genesis and migration patterns of neurons forming the patch and  
568 matrix compartments of the rat striatum. *Brain Res Dev Brain Res* 83:233–245.
- 569 Spear LP (2013) Adolescent neurodevelopment. *J Adolesc Health* 52:S7-13.
- 570 Straub C, Tritsch NX, Hagan NA, Gu C, Sabatini BL (2014) Multiphasic modulation of  
571 cholinergic interneurons by nigrostriatal afferents. *J Neurosci* 34:8557–8569.

- 572 Sturman DA, Mandell DR, Moghaddam B (2010) Adolescents exhibit behavioral differences  
573 from adults during instrumental learning and extinction. *Behav Neurosci* 124:16–25.
- 574 Sturman DA, Moghaddam B (2012) Striatum processes reward differently in adolescents versus  
575 adults. *Proc Natl Acad Sci USA* 109:1719–1724.
- 576 Sulzer D, Cragg SJ, Rice ME (2016) Striatal dopamine neurotransmission: regulation of release  
577 and uptake. *Basal Ganglia* 6:123–148.
- 578 van der Kooy D, Fishell G (1987) Neuronal birthdate underlies the development of striatal  
579 compartments. *Brain Res* 401:155–161.
- 580 Westerga J, Gramsbergen A (1990) The development of locomotion in the rat. *Brain Res Dev*  
581 *Brain Res* 57:163–174.
- 582 Wilson CJ (2005) The mechanism of intrinsic amplification of hyperpolarizations and  
583 spontaneous bursting in striatal cholinergic interneurons. *Neuron* 45:575–585.
- 584 Wilson CJ, Chang HT, Kitai ST (1990) Firing patterns and synaptic potentials of identified giant  
585 aspiny interneurons in the rat neostriatum. *J Neurosci* 10:508–519.
- 586 Wilson CJ, Goldberg JA (2006) Origin of the slow afterhyperpolarization and slow rhythmic  
587 bursting in striatal cholinergic interneurons. *J Neurophysiol* 95:196–204.
- 588 Zariwala HA, Borghuis BG, Hoogland TM, Madisen L, Tian L, De Zeeuw CI, Zeng H, Looger  
589 LL, Svoboda K, Chen T-W (2012) A Cre-dependent GCaMP3 reporter mouse for  
590 neuronal imaging in vivo. *J Neurosci* 32:3131–3141.
- 591 Zhang H, Sulzer D (2004) Frequency-dependent modulation of dopamine release by nicotine.  
592 *Nat Neurosci* 7:581–582.



593 Zhang Y-F, Reynolds JNJ, Cragg SJ (2018) Pauses in Cholinergic Interneuron Activity Are

594 Driven by Excitatory Input and Delayed Rectification, with Dopamine Modulation.

595 Neuron 98:918–925.e3.

596 Zhou FM, Liang Y, Dani JA (2001) Endogenous nicotinic cholinergic activity regulates

597 dopamine release in the striatum. Nat Neurosci 4:1224–1229.

598 Zoli M, Moretti M, Zanardi A, McIntosh JM, Clementi F, Gotti C (2002) Identification of the

599 nicotinic receptor subtypes expressed on dopaminergic terminals in the rat striatum. J

600 Neurosci 22:8785–8789.

601

602

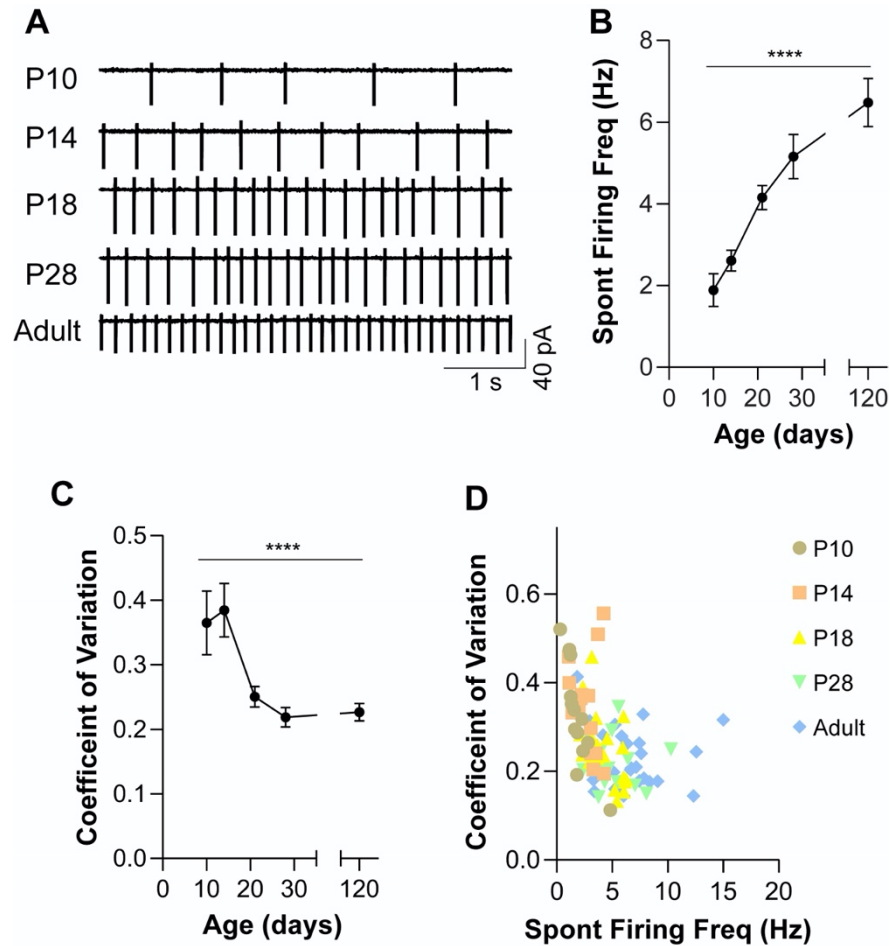

603

604 **Figure 1. Postnatal maturation of spontaneous Chl activity.** (A) Sample cell-attached  
605 recordings from ChIs at P10, P14, P18, P28 and adults (P110-120). (B) A significant increase in  
606 Chl spontaneous firing frequency from P10 to adulthood. P10 n = 18 cells (4 mice), P14 n =  
607 16(2), P18 n = 23(4), P28 n = 15(3), Adult n=28(6). N is the same in (C-D). (C) Age significantly  
608 affects the coefficient of variation of Chl spontaneous activity. (D) Plot of coefficient of variation  
609 and spontaneous firing frequency for each recorded cell. Cells are colored by age.  $R^2 = 0.205$ ;  
610  $p < 0.0001$ . \*\*\*\*  $p < 0.0001$ . Data analyzed in (B) and (C) with one-way ANOVA. Mean +/- sem is  
611 shown.

612

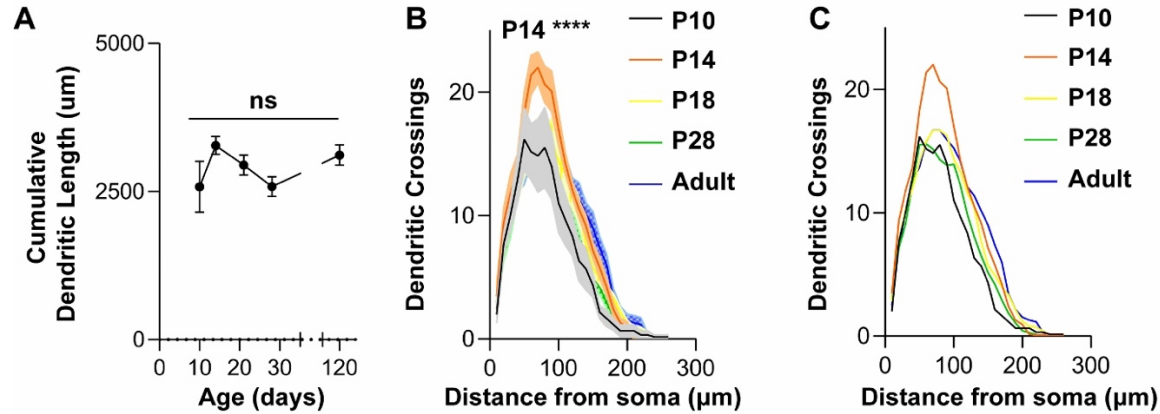

613

614 **Figure 2. Postnatal maturation of Ch1 dendritic morphology. (A)** There was no effect of age

615 on the cumulative dendritic length of Ch1s. P10: n = 6(3), P14: n = 13 (2), P18:15 (4), P28: n =

616 14(3), Adult: n = 13(5). **(B)** Sholl analysis reveals a significantly increased number of dendritic

617 crossings in Ch1s from P14 mice 50-90 µm from the soma compared to all other ages. Data

618 analyzed by two-way repeated measures ANOVA followed by post-hoc Bonferroni test. Age x

619 Distance:  $F(84, 1232) = 1.430, p=0.008$ . **(C)** Mean dendritic crossings are shown without error

620 bars for clarity. Data are the same as in **(B)**.

621

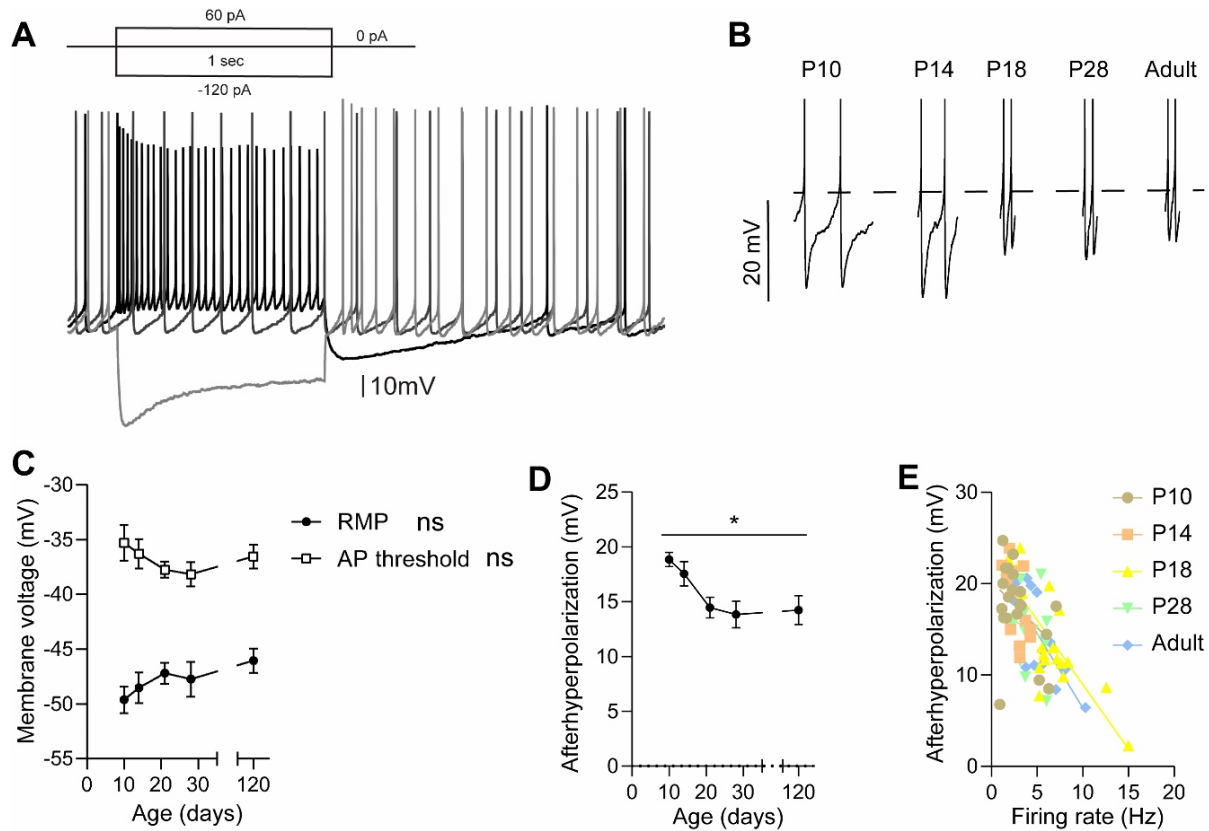

622

623 **Figure 3. Chl afterhyperpolarization decreases between P14 and P18.** (A) Sample current  
624 clamp trace of Chl activity in response to depolarizing and hyperpolarizing current injections. (B)  
625 Sample expanded traces of pairs of action potentials from Chls recorded at the specified ages.  
626 Dashed line denotes action potential threshold. (C) No significant effect of age on resting  
627 membrane potential (RMP) (age:  $p = 0.2919$ ) or AP threshold (age:  $p = 0.4404$ ). (D) A  
628 significant effect of age on the afterhyperpolarization ( $p = 0.0102$ ). For (C-D), P10  $n = 18$  cells  
629 (4 mice), P14  $n = 16$ (2), P18  $n = 23$ (4), P28  $n = 15$ (3), Adult  $n = 28$ (6). (E) Correlation between  
630 afterhyperpolarization and firing rate in Chls from all ages.  $R^2 = 0.433$ ;  $p < 0.0001$ . (C-D)  
631 analyzed with a one-way ANOVA.

632

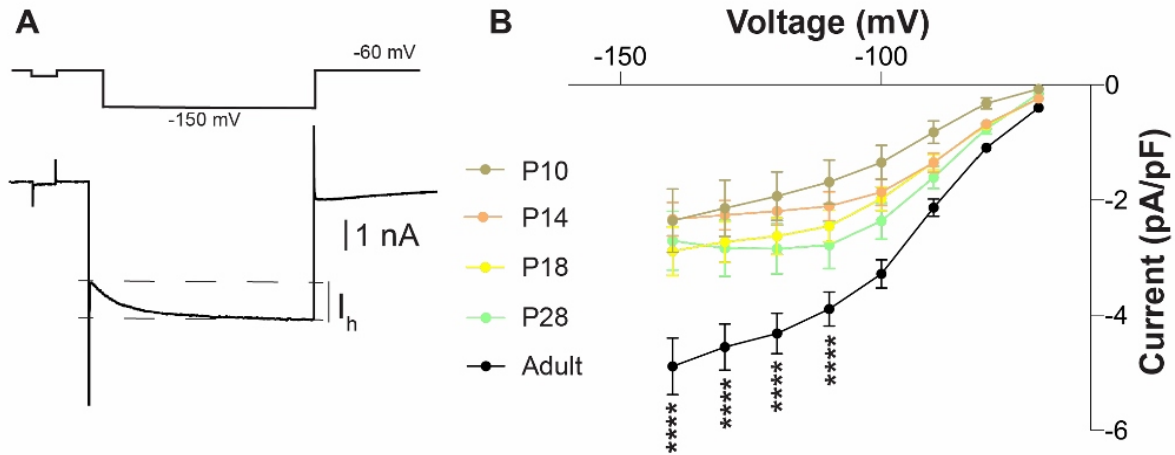

633

634 **Figure 4. Postnatal maturation of putative  $I_h$  currents. (A)** Sample voltage clamp recording

635 demonstrating the inactivating  $I_h$  current. **(B)** Aggregate  $I_h$  current density shows a significant

636 increase between P28 and adulthood but no difference at younger ages. P10 n = 18 cells (4

637 mice), P14 n = 16(2), P18 n = 23(4), P28 n = 15(3), Adult n = 28(6). Data analyzed by two-way

638 repeated measure ANOVA followed by Bonferroni post-hoc test. Age x current:

639  $F(28,602)=4.580, p<0.0001$ .

640

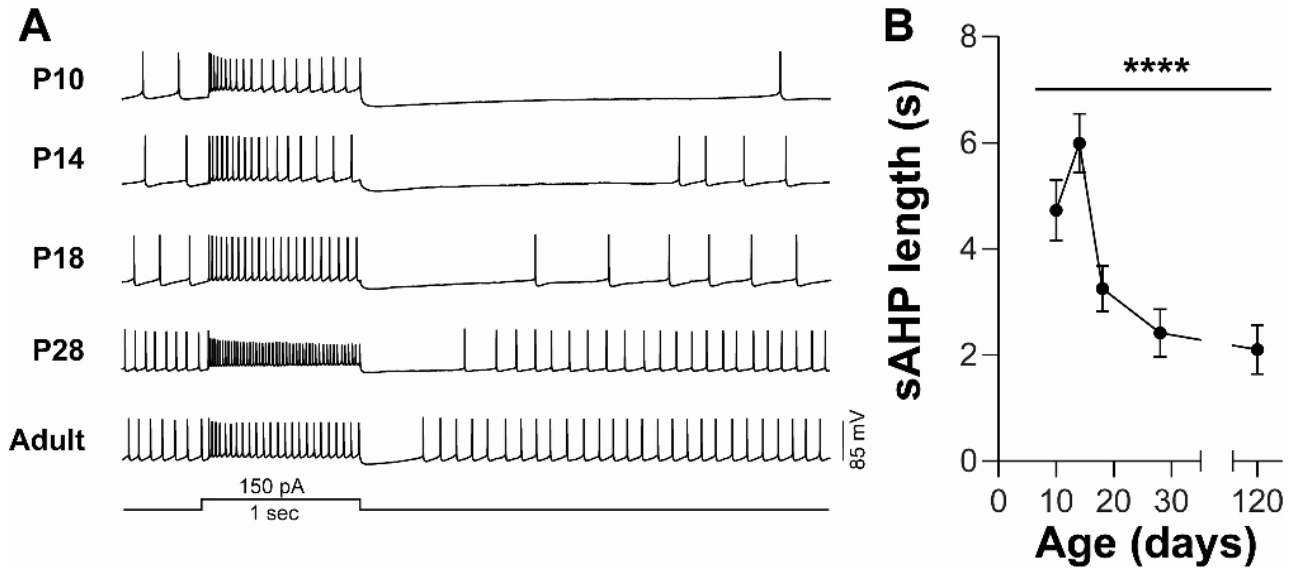

641

642 **Figure 5. Postnatal decreases in the sAHP. (A)** Sample current clamp recording showing the  
643 response to injection of depolarizing current. The length of the pause in firing following the end  
644 of the current step is quantified in **(B)**. **(B)** Aggregate sAHP length shows a significant effect of  
645 age. P10 n = 18 cells (4 mice), P14 n = 16(2), P18 n = 23(4), P28 n = 15(3), Adult n = 28(6).

646 Data analyzed with one-way ANOVA.

647

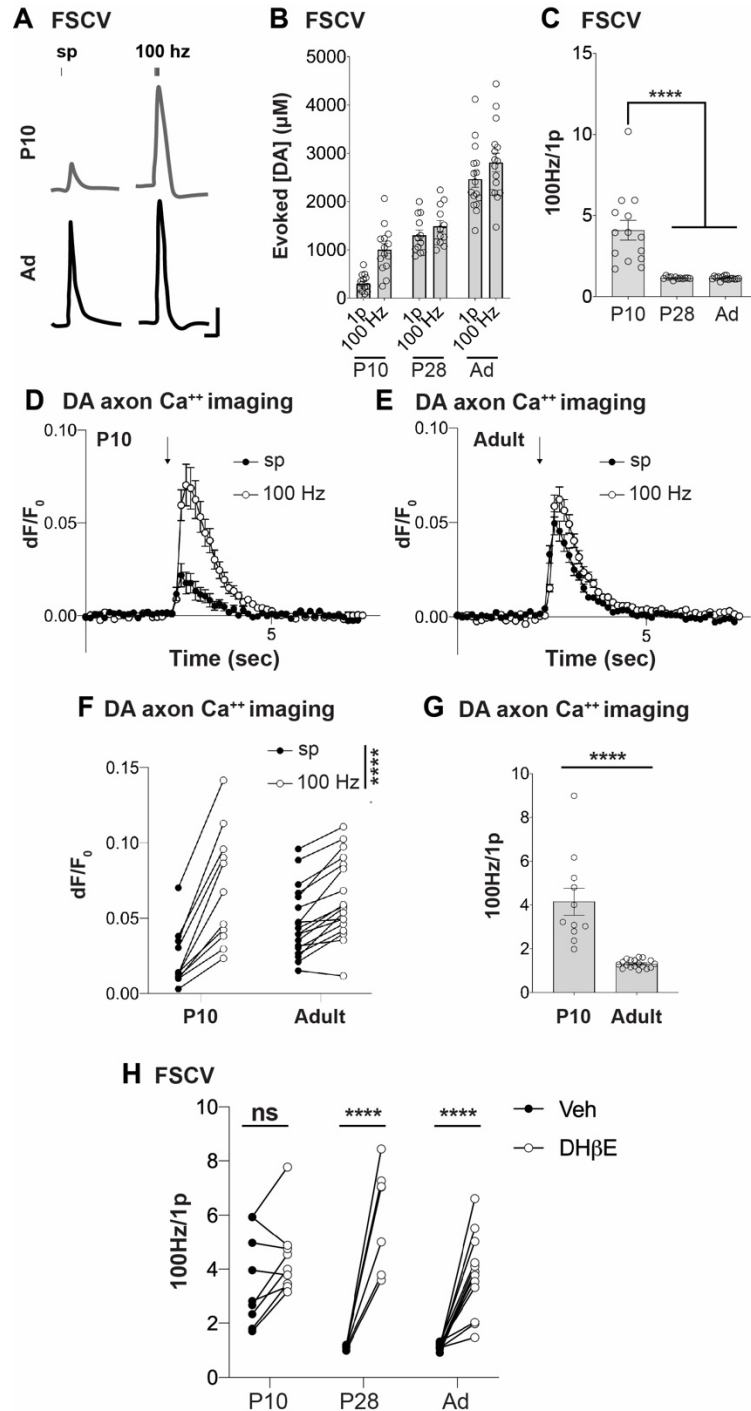

648

649 **Figure 6. Reduced cholinergic activity at P10 leads to immature DA release properties.**

650 **(A)** Sample cyclic voltammetry recordings of evoked striatal DA release with a single pulse (sp)

651 or 5 pulses at 100 Hz at P10 or in adult striatal slices. Scale bar: 200 nM and 200 ms. **(B)**

652 Absolute peak concentrations of evoked DA release following a single pulse (1p) or five pulses

653 at 100 Hz. **(C)** Absolute concentrations from **(B)** displayed as the ratio of DA evoked with 5  
654 pulses at 100 Hz to a single pulse in striatal slices from mice aged P10, P28 or Adult. P10 n =  
655 14 slices from 4 mice, P28 n = 12 slices from 3 mice, Adult n = 14 slices from 3 mice. Data  
656 analyzed by one-way ANOVA followed by Bonferroni post-hoc test. **(D-E)**  $\Delta F/F$  of GCaMP3 in  
657 DA axons within acute slices from **(D)** P10 or **(E)** adult mice. Arrow indicates time of electrical  
658 stimulation with either a single pulse or pulses at 100 Hz. **(F)**  $\Delta F/F$  from each slice after a single  
659 pulse or 100 Hz stimulation. Two-way repeated measures ANOVA: age x frequency,  
660  $F_{(1,27)}=40.04$ ,  $p<0.0001$ . **(G)** Fold change in  $\Delta F/F$  after 100 Hz stimulation compared to a single  
661 pulse.  $T_{27}=5.902$ ,  $p<0.0001$ . P10: n = 11 slices from 3 mice. Adult: n = 18 slices from 6 mice. **(H)**  
662 DH $\beta$ E (1  $\mu$ M) significantly increases the 100 Hz/1p ratio at P28 and adult but not at P10. Data  
663 analyzed with two-way repeated measures ANOVA followed by Bonferroni post-hoc test. Age x  
664 Drug:  $F(2,26) = 15.26$ ,  $p<0.0001$ . P10 n = 9 slices from 4 mice, P28 n = 7 slices from 2 mice,  
665 Adult n = 13 slices from 3 mice.  
666  
667
